# Supplementary material for: Time makes histone H3 modifications drift in mouse liver
Source: publisher site journal article supplement (doi:10.18632/aging.204107), 2022-06-10
Supplement: Supplementary file [file aging-v14i12-204107-supplementary-material-SD2.pdf]

## SUPPLEMENTARY TABLES

**Supplementary Table 1. Number of available samples across all groups of this experiment.**

|                 | <b>SD 3m</b> | <b>SD 6m</b> | <b>SD 12m</b> | <b>CR 12m</b> | <b>Total</b> |
|-----------------|--------------|--------------|---------------|---------------|--------------|
| <b>H3K4me3</b>  | 7            | 3            | 8             | 5             | 23           |
| <b>H3K27me3</b> | 7            | 6            | 8             | 6             | 27           |
| <b>H3K27ac</b>  | 8            | 6            | 7             | 9             | 30           |
| <b>H3K4me1</b>  | 8            | 5            | 6             | 9             | 28           |
| <b>Total</b>    | 30           | 20           | 29            | 29            | 108          |

**Supplementary Table 2. Fraction of the genome that changes chromatin state compared to the young (SD 3m) group.**

|        | <b>Fraction of genome with same chromatin state</b> | <b>Fraction of genome with different chromatin state</b> |
|--------|-----------------------------------------------------|----------------------------------------------------------|
| SD 6m  | 78.9%                                               | 21.1%                                                    |
| SD 12m | 68.1%                                               | 31.9%                                                    |
| CR 12m | 75.8%                                               | 24.2%                                                    |

The percentage of the genome of older groups (6 months and 12 months in both SD and CR) which was found to change chromatin state compared to the youngest group (SD 3m).
